# Supplementary material for: Highly cross-linked Cu/a-Si core–shell nanowires for ultra-long cycle life and high rate lithium batteries
Source: Royal Society of Chemistry journal article supplement (doi:10.1039/c5nr06985h), 2015-11-03
Supplement: c5nr06985h1.pdf [file c5nr06985h1.pdf]

Electronic Supplementary Material (ESI) for Nanoscale.

This journal is © The Royal Society of Chemistry 2014

## Supporting Information to

### Highly cross-linked a-Si/Cu core-shell nanowires as durable anode for Li ion battery with long cycle life and high rate performance

HongXiang Wang<sup>a</sup>, Hucheng Song<sup>a</sup>, Zixia Lin<sup>a</sup>, Xiaofan Jiang<sup>a</sup>, Xiaowei Zhang<sup>a</sup>, Linwei YU<sup>a\*</sup>,  
Jun XU<sup>a</sup>, Lijia Pan<sup>a</sup>, Junzhan Wang<sup>a\*</sup>, Mingbo Zheng<sup>a</sup>, Yi Shi<sup>a</sup>, and Kunji Chen<sup>a</sup>

National Laboratory of Solid State Microstructures and School of Electronics Science and  
Engineering/Collaborative Innovation Center of Advanced Microstructures, Nanjing University,  
Nanjing 210093, China

Emails: [yulinwei@nju.edu.cn](mailto:yulinwei@nju.edu.cn)(Linwei Yu) and [wangjz@nju.edu.cn](mailto:wangjz@nju.edu.cn) (Junzhan Wang)

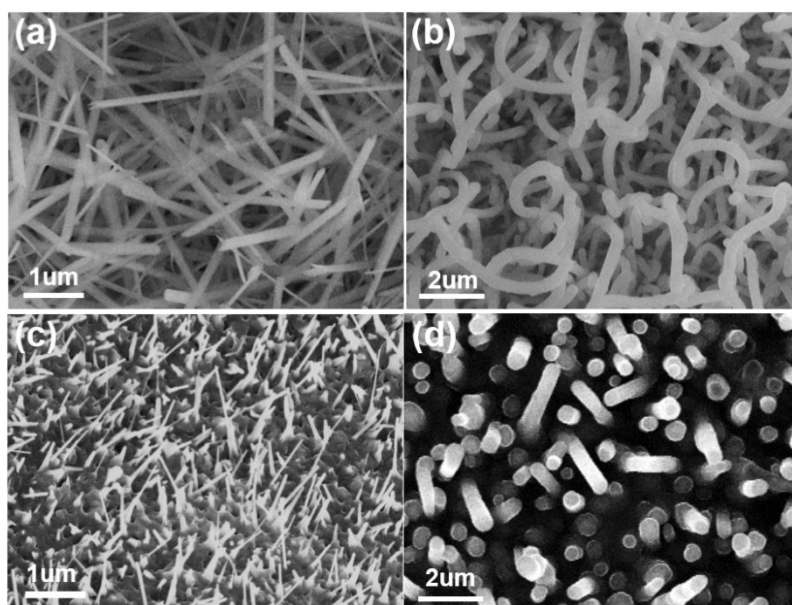

**Fig. S1** SEM image of the highly cross-linked structure and no cross-linked structure a-Si/Cu core-shell anode. (a) Highly crossing  $\text{Cu}(\text{OH})_2$  NWs by CBD (b) Highly cross-linked structure a-Si/Cu core-shell anode by a simple a-Si deposition. (c) Little crossing CuO NWs by thermal oxidation (d) No cross-linked structure a-Si/Cu core shell anode on the flat copper plate.

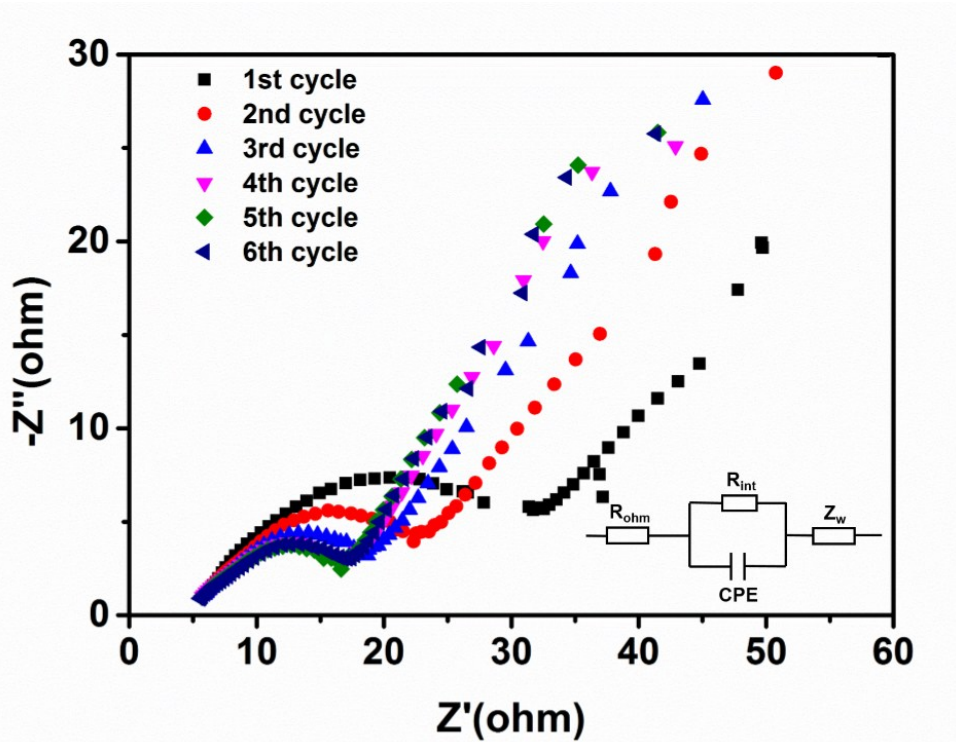

Fig. S2 the EIS spectra of the Cu/a-Si core-shell LIBs during the first 6 runs of cycling.

**S.3/ Table 1:** The electrochemical performance of core-shell nanowires structure.

| No. | Material & Structure                                                       | Cross-linked | Current density (A/g) | Cycles | Capacity after cycles (mAh/g) | Capacity retention | Reference & Journal and Year          |
|-----|----------------------------------------------------------------------------|--------------|-----------------------|--------|-------------------------------|--------------------|---------------------------------------|
| 1   | CNT-Si composite                                                           | No           | ~ 2                   | 50     | ~ 980                         | Capacity: 57%      | Ref. [25]<br>Adv. Mater, 2014         |
|     |                                                                            |              | ~ 2-3-2               | 30     | ~1000                         | Rate: 60%          |                                       |
| 2   | CNT-Si core shell wires                                                    | No           | ~ 0.84                | 80     | ~ 2510                        | Capacity: ~ 91%    | Ref. [27]<br>Nanoscale, 2013          |
|     |                                                                            |              | ~ 0.84-50-0.84        | 77     | ~ 980                         | Rate: ~ 94%        |                                       |
| 3   | CNT-Si nanowires                                                           | No           | ~ 0.84                | 100    | 2502                          | Capacity: ~ 90%    | Ref. [26]<br>Carbon, 2013             |
| 4   | a-Si/NiSix core-shell nanowire                                             | No           | -----                 | 50     | 3000                          | Capacity: ~ 83%    | Ref.[24]<br>Chem.Sci.,2011            |
| 5   | a-Si/NiSix core-shell nanowire with alumina                                | Yes          | ~0.9                  | 90     | 3000                          | Capacity: ~ 100%   | Ref.[23]<br>J.Mater.Chem.,2012        |
| 6   | Highly-interconnected Si NWs on SS substrate                               | Yes          | ~ 8.4                 | 70     | ~ 1800                        | Capacity: ~ 84%    | Ref. [31]<br>Adv. Energy. Mater, 2011 |
|     |                                                                            |              | ~ 0.4-34-0.4          | 72     | ~ 420                         | Rate: ~ 84%        |                                       |
| 7   | Si particles on TiSi <sub>2</sub> matrix                                   | Yes          | ~6                    | 100    | ~ 1310                        | Capacity: ~90%     | Ref.[21]<br>ACS Nano,2011             |
|     |                                                                            |              | ~0.6-15-0.6           | 40     | ~ 800                         | Rate : ~85%        |                                       |
| 8   | Cu-Si-Al <sub>2</sub> O <sub>3</sub> nanoscale array grown on Cu substrate | No           | ~1.4                  | 100    | ~ 1560                        | Capacity: ~90%     | Ref. [30]<br>Adv. Mater, 2011         |
|     |                                                                            |              | ~0.3-70-0.3           | 61     | ~ 200                         | Rate: ~76%         |                                       |
| 9   | 3D silicon on nanopillar copper anodes                                     | No           | ~1.0                  | 100    | ~ 1627                        | Capacity: ~83%     | Ref.[13]<br>ACS Nano, 2014            |
|     |                                                                            |              | ~40                   | 300    | ~ 996                         | Capacity: ~100%    |                                       |
|     |                                                                            |              | ~1.0-40-1.0           | 80     | ~ 587                         | Rate:~87%          |                                       |
| 10  | Highly cross-linked Cu/a-Si core-shell nanowire                            | Yes          | ~ 3.6                 | 700    | ~ 748                         | Capacity: ~ 80%    | This work                             |
|     |                                                                            |              | ~1.0                  | 1000   | ~ 1026                        | Capacity: ~ 80%    |                                       |
|     |                                                                            |              | ~ 0.7-44.8-0.7        | 320    | ~ 200                         | Rate: ~ 80%        |                                       |
